# Supplementary material for: A meta-analysis of baseline characteristics in trials on mite allergen avoidance in asthmatics: room for improvement
Source: PubMed Central journal article supplement (PMC6943957; doi:10.1186/s13601-019-0306-3), 2020-01-06
Supplement: 13601_2019_306_MOESM1_ESM.pdf [file 13601_2019_306_MOESM1_ESM.pdf]

## Appendix S1

### Reference search; keywords for embase.com

('Pyroglyphidae'/exp OR 'mite'/de OR 'Acari'/de OR 'house dust'/de OR 'house dust allergen'/de OR 'mite infestation'/de OR 'house dust allergy'/de OR 'dust exposure'/de OR (Dermatophagoid\* OR mite OR mites OR 'D farinae' OR 'd pteronyssinus' OR Pyroglyphid\* OR Euroglyph\* OR 'e maynei' OR Acari\* OR housedust\* OR (dust NEAR/6 (allerg\* OR sensiti\* OR hypersensiti\* OR indoor\* OR house\* OR domestic\* OR asthma\* OR ambient\*))) :ab,ti) AND ('air conditioning'/de OR 'exposure'/de OR 'dust exposure'/de OR 'environmental exposure'/de OR 'environmental parameters'/de OR 'avoidance behavior'/de OR 'environmental factor'/de OR 'environmental management'/de OR 'textile'/de OR 'home environment'/de OR 'tertiary prevention'/de OR 'microclimate'/de OR 'room ventilation'/de OR 'air quality'/de OR 'ambient air'/de OR 'air quality control'/de OR humidity/de OR 'environmental sanitation'/de OR 'sanitation'/de OR (avoidance\* OR (impermeab\* NEAR/3 cover\*) OR ((humid\* OR allergen\* OR climate\*) NEAR/3 (control\* OR reduction\*)) OR (air NEAR/3 (condition\* OR filt\* OR qualit\* OR ambient\* OR control\* OR clean\*)) OR ventilat\* OR expos\* OR textile\* OR load OR environment\* OR (dust NEAR/3 level\*) OR anti-mite OR spray\* OR mattress\* OR management\* OR (tertiary NEAR/3 prevent\*) OR microclimate\* OR micro-climate\* OR sanitation OR bed-cloth\* OR bed-cover\* OR bedding OR furnish\*):ab,ti) AND ('Controlled clinical trial'/exp OR 'Crossover procedure'/de OR 'Double-blind procedure'/de OR 'Single-blind procedure'/de OR (random\* OR factorial\* OR crossover\* OR (cross NEXT/1 over\*) OR placebo\* OR ((doubl\* OR singl\*) NEXT/1 blind\*) OR assign\* OR allocat\* OR volunteer\* OR trial OR groups):ab,ti) NOT ([animals]/lim NOT [humans]/lim) NOT ([Conference Abstract]/lim) AND [English]/lim

### List of included and excluded studies in the updated search.

|    | <b>Author</b> | <b>Year</b> | <b>Included?</b> | <b>Rationale</b>                                  |
|----|---------------|-------------|------------------|---------------------------------------------------|
| 1  | Eick          | 2011        | No               | not patients with house dust mite-allergic asthma |
| 2  | Glasgow       | 2011        | No               | excluded by Gotzsche and Johansen                 |
| 3  | Maas          | 2011        | No               | not tertiary prevention                           |
| 4  | Neymayr       | 2011        | No               | not a clinical trial                              |
| 5  | Takaro        | 2011        | No               | not randomized                                    |
| 6  | Breyse        | 2012        | No               | not a clinical trial                              |
| 7  | Celano        | 2012        | No               | not patients with house dust mite-allergic asthma |
| 8  | El-Ghitany    | 2012        | Yes              |                                                   |
| 9  | Gehring       | 2012        | No               | not tertiary prevention                           |
| 10 | Ho            | 2012        | No               | abstract                                          |
| 11 | Masna         | 2012        | No               | abstract                                          |
| 12 | Scott         | 2012        | No               | not tertiary prevention                           |
| 13 | NCT           | 2013        | No               | protocol issue                                    |
| 14 | Tsurikisawa   | 2013        | No               | not blinded                                       |
| 15 | Hogaard       | 2014        | No               | abstract                                          |
| 16 | NCT           | 2014        | No               | duplicate                                         |
| 17 | Hogaard       | 2014        | No               | duplicate                                         |
| 18 | Murray        | 2015        | No               | duplicate                                         |
| 19 | Smith         | 2015        | No               | not blinded                                       |
| 20 | Sumner        | 2015        | No               | duplicate                                         |
| 21 | Dimango       | 2016        | No               | not patients with house dust mite-allergic asthma |
| 22 | NCT           | 2016        | No               | protocol issue                                    |
| 23 | Tsurikisawa   | 2016        | No               | not blinded                                       |
| 24 | Winn          | 2016        | No               | not a clinical trial                              |
| 25 | Luo           | 2017        | No               | abstract                                          |
| 26 | Murray        | 2017        | Yes              |                                                   |
| 27 | Morten        | 2018        | No               | not patients with house dust mite-allergic asthma |
| 28 | Bjermer       | 2019        | No               | not a clinical trial                              |

**Number of trials available per subgroup.**

| Category            | FEV <sub>1</sub> %pred. | PC <sub>20</sub> | Std. ASSs |
|---------------------|-------------------------|------------------|-----------|
| Steroids            | 9                       | 9                | 7         |
| No steroids         | 5                       | 5                | 4         |
| Child               | 5                       | 6                | 5         |
| Adult               | 11                      | 9                | 7         |
| Co-sensitization    | 8                       | 9                | 7         |
| No co-sensitization | 2                       | 2                | 2         |

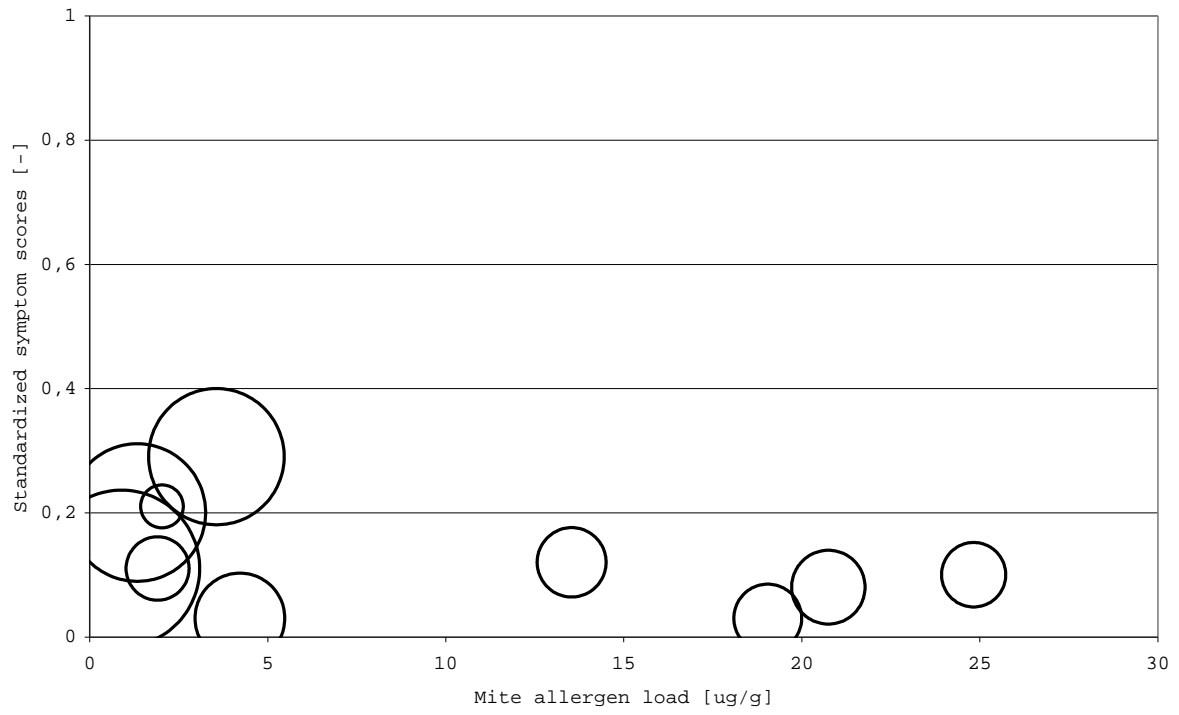

Figure. Bel plot for the standardized asthma symptom scores against the mite allergen load from the mattress at baseline.

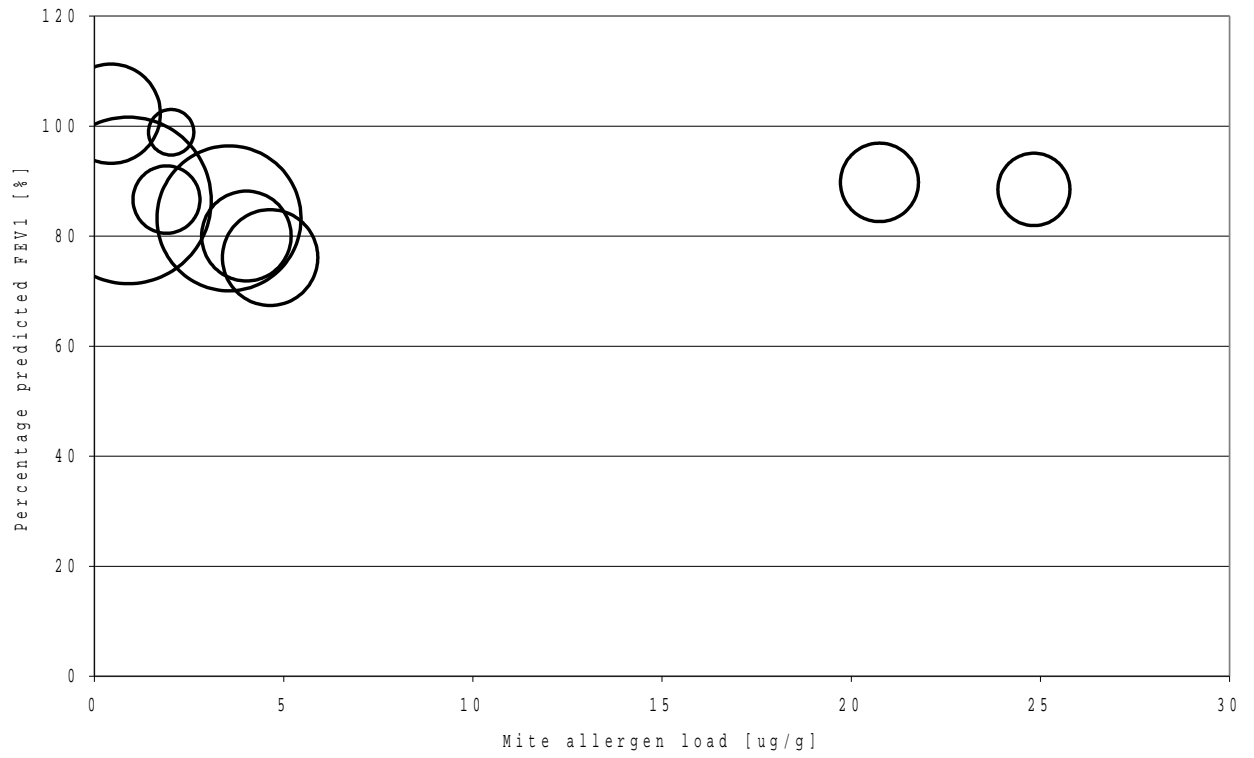

Figure. Bel plot for the FEV<sub>1</sub> percentage of predicted against the mite allergen load from the mattress at baseline.

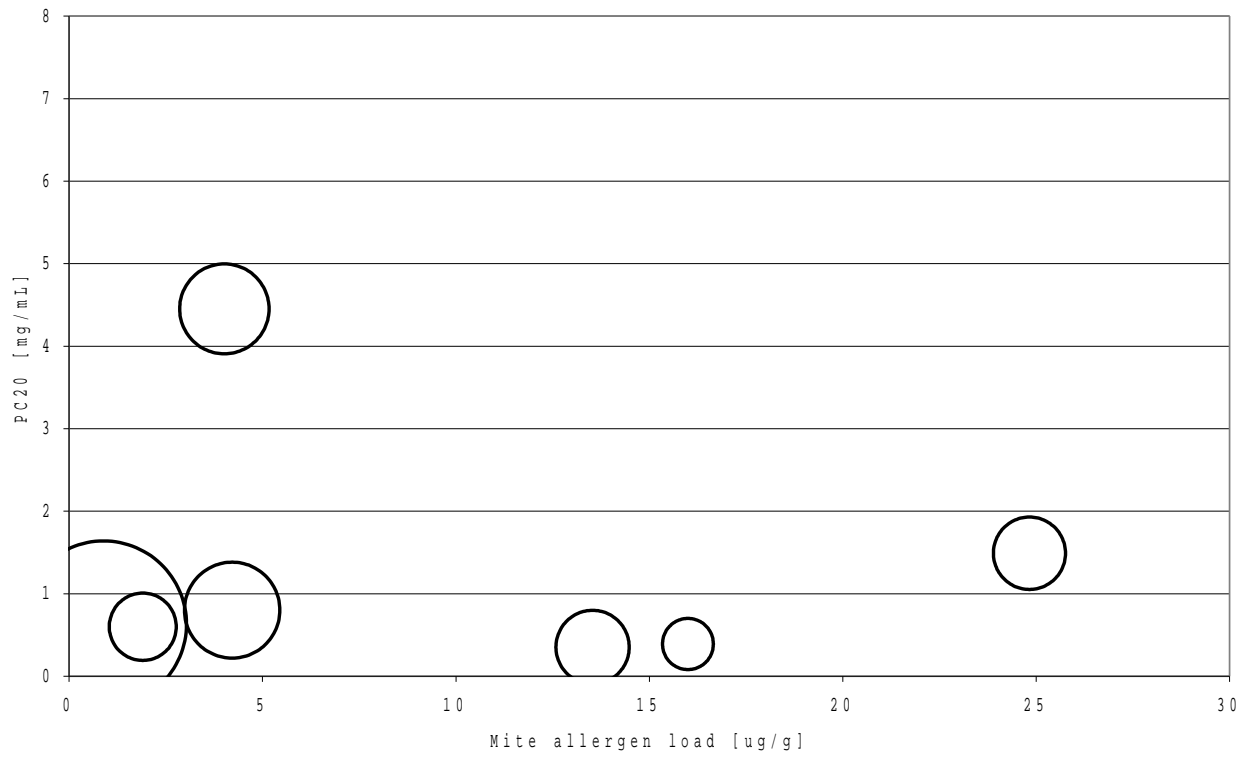

Figure. Bel plot for the PC<sub>20</sub> against the mite allergen load from the mattress at baseline.
